# Supplementary material for: COXIBs and 2,5-dimethylcelecoxib counteract the hyperactivated Wnt/β-catenin pathway and COX-2/PGE2/EP4 signaling in glioblastoma cells
Source: PubMed Central journal article supplement (PMC8091781; doi:10.1186/s12885-021-08164-1), 2021-05-03

**A**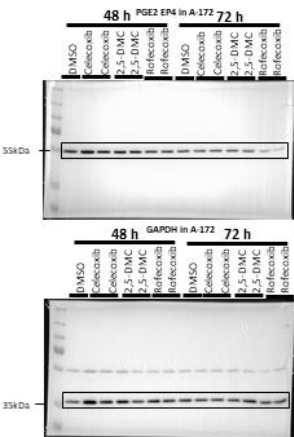**B**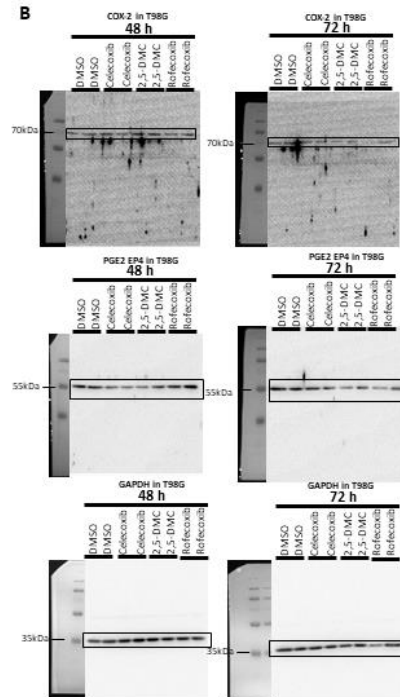**C**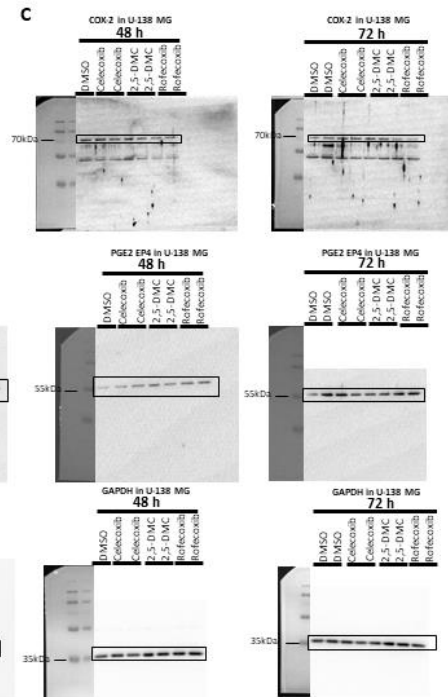**D**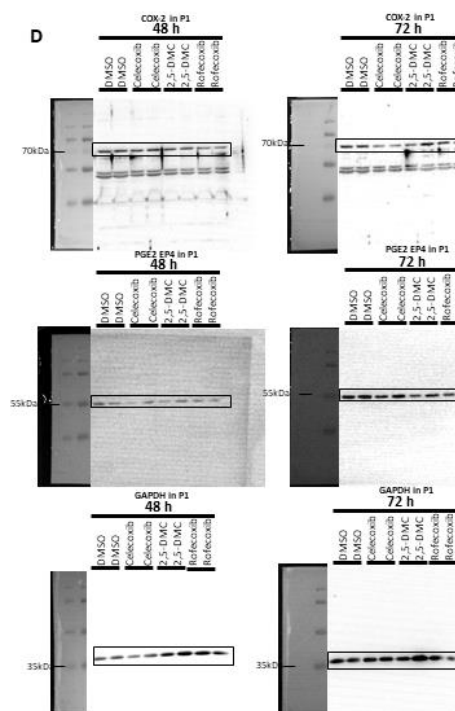**E**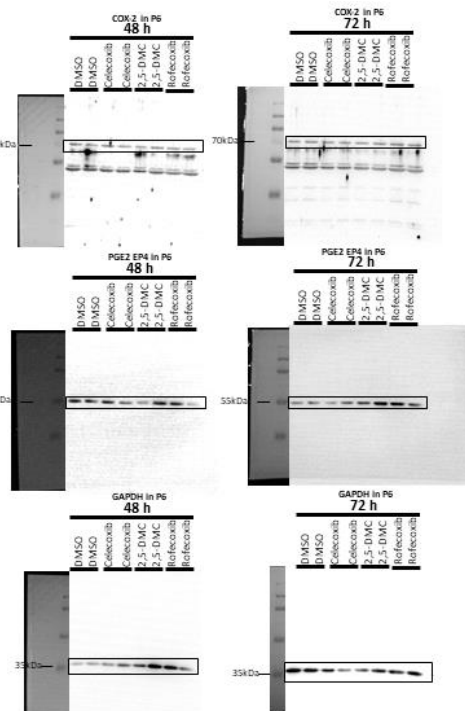

Supplement: 12885_2021_8164_MOESM1_ESM.pdf [file 12885_2021_8164_MOESM1_ESM.pdf]
